# Supplementary material
Source: HighWire-hosted journal article supplement (https://www.cmaj.ca/content/suppl/2020/02/24/192.9.E199)
Supplement: 191292_annexe_1.pdf [file 191292_annexe_1.pdf]

### **Annexe 1 (telle que soumise par les auteurs) : le modèle**

Pour établir une projection de l'incidence et de la mortalité, nous avons utilisé CANPROJ, un progiciel R qui utilise un algorithme d'arbre de décision pour sélectionner le modèle de projection le mieux adapté. CANPROJ a précédemment été mis au point dans le cadre d'une collaboration dirigée par le Partenariat canadien contre le cancer afin d'unifier les approches de modélisation des tendances en matière d'incidence du cancer au Canada (1). Grâce à l'algorithme de l'arbre de décision, CANPROJ permet de sélectionner de manière itérative le modèle le plus approprié en fonction de la présence d'effets d'âge et de la génération ainsi que d'une dérive importante et d'une dispersion. L'algorithme est présenté dans Poirier et coll. 2019 (2).

Les modèles que CANPROJ permet de sélectionner comprennent : l'âge seulement, l'âge-période (y compris la tendance commune et la tendance propre à l'âge), la cohorte d'âge et la méthode Nordpred (cohorte âge-période-dérive), la distribution binomiale négative et la régression de Poisson (en cas de dispersion). L'annexe comprend des descriptions statistiques détaillées pour chacun des modèles, tirées de Poirier et coll., 2019 ([lien vers l'article](#)). Des analyses de validation antérieures ont montré que l'approche algorithmique CANPROJ est plus flexible et peut surpasser d'autres approches traditionnelles telles que le modèle de régression Joinpoint, le modèle de régression de Poisson, la régression polynomiale et la fonction spline naturelle (3) ainsi que des approches plus complexes telles que la méthode statistique bayésienne et la méthode de Monte Carlo par chaîne de Markov (4). Il convient particulièrement de noter l'étude de validation antérieure qui suggérait que l'approche CANPROJ surpassait les modèles Nordpred (modèle linéaire généralisé âge-période-cohorte) et hybride (âge-période) lors de l'examen des tendances relatives à l'incidence du cancer à court et à long terme. (5) Il a également été démontré précédemment que les modèles sélectionnés par CANPROJ donnent de bons résultats pour les projections de l'incidence à court terme par rapport aux tendances propres aux sièges de cancer au Canada lorsqu'on les applique aux données historiques jusqu'en 2012 et qu'on examine ensuite les données observées et projetées de 2012 à 2015 à l'aveugle (2).

## Références

1. Qui Z. The Cancer Projection Analytical Network Working Team. Canproj—The R Package of Cancer Projection Methods Based on Generalized Linear Models for Age, Period, and/or Cohort. Alberta Health Services 2011.
2. Poirier AE, Ruan Y, Walter SD, Franco EL, Villeneuve PJ, King WD, *et al.* The future burden of cancer in Canada: Long-term cancer incidence projections 2013-2042. *Cancer epidemiology.* 2019;59:199-207.
3. Qiu M, Wang M, Wang R, Dewar R, Hatcher J. Comparison of Projection Methods: Validation Analysis Using Nova Scotia Cancer Registry Database. Alberta Health Services and Cancer Care Nova Scotia. 2011.
4. Bray I. Application of Markov chain Monte Carlo methods to projecting cancer incidence and mortality. *J R Stat Soc : Ser C (Appl Stat)* 51 (2). 2002:151-64.
5. The Cancer Projection Analytical Network Working Team. Long-Term Projection Methods: Comparison of Age-Period-Cohort Model-Based Approaches. Alberta Health Services, 2010.
